# Supplementary material for: Towards the synthesis of sugar amino acid containing antimicrobial noncytotoxic CAP conjugates with gold nanoparticles and a mechanistic study of cell disruption
Source: Royal Society of Chemistry journal article supplement (doi:10.1039/c1ob05338h), 2011-01-01

# **Towards the Synthesis of Sugar Amino Acid Containing Antimicrobial Noncytotoxic CAP Conjugates with Gold Nanoparticles and Their Mechanistic Study Towards Cell Disruption<sup>§</sup>**

**Sudip Pal, Kalyan Mitra, Sarfuddin Azmi, Jimut Kanti Ghosh and Tushar Kanti Chakraborty\***  
Central Drug Research Institute, CSIR, Lucknow 226001, India

**Email: chakraborty@cdri.res.in**

## **Supporting Information**

| <b>Contents</b>                                                       | <b>Page No.</b> |
|-----------------------------------------------------------------------|-----------------|
| 1. General Procedure for conjugating peptides to AuNP                 | 2               |
| 2. General methods for RPHPLC and HPLC Data for peptides <b>1-4</b>   | 2               |
| 3. HPLC chromatogram of <b>1</b>                                      | 3               |
| 4. HPLC chromatogram of <b>2</b>                                      | 3               |
| 5. HPLC chromatogram of <b>3</b>                                      | 4               |
| 6. HPLC chromatogram of <b>4</b>                                      | 4               |
| 7. TOCSY spectrum of <b>1</b> (DMSO-D <sub>6</sub> , 300 K, 400 MHz)  | 5               |
| 8. TOCSY spectrum of <b>2</b> (DMSO-D <sub>6</sub> , 300 K, 400 MHz)  | 6               |
| 9. TOCSY spectrum of <b>3</b> (DMSO-D <sub>6</sub> , 300 K, 400 MHz)  | 7               |
| 10. TOCSY spectrum of <b>4</b> (DMSO-D <sub>6</sub> , 300 K, 400 MHz) | 8               |

**General Procedure for Attachment of Thiol functionalized AuNP in toluene to the Synthesized Peptides:** Peptide **1** (10 mg) was taken in a 5 ml pear shaped flask. To it 0.5 mL of dry MeOH was added. Then 0.5 mL of octanethiol functionalized Au nanoparticle in toluene (2-4 nm, 2% w/v; from Sigma-Aldrich) was added to the solution and incubated at room temperature for 4 days. Thereafter, the supernatant liquid was decanted and the precipitated particles were washed with MeOH. Now, supernatant liquid and washings were combined and concentrated. The solid residue was re-dissolved in dry MeOH, vortexed and centrifuged to remove any unreacted Au nanoparticles. The supernatant liquid was decanted and the residue washed with dry MeOH. The combined clear MeOH solution was concentrated and the solid residue was washed with hexane to remove any trace of liberated octanethiol. The solid compound was then dried, dissolved in water to prepare the required concentrated AuNP attached aqueous peptide solution and submitted for the biological activity.

N.B.- A blank test was carried out to see if the octanethiol stabilized AuNPs were stable in methanol solution or not. A 0.5 mL of octanethiol stabilized AuNP solution was taken in a 5 mL pear shaped flask, concentrated and dried. 1mL dry MeOH was added and kept at room temperature for 4 days. No AuNP had come to the MeOH solution (detected by TEM). This indicated that our peptide (which contains the thiol functionality) was responsible to take the AuNP to polar solvent like MeOH or water.

**General methods For RP-HPLC:** an analytical Supelco C<sub>5</sub> column (4.6 mm i.d. × 250 mm, 5 μm particle size) was used in combination with elutants A (0.1% TFA in H<sub>2</sub>O) and B (0.1% TFA in MeCN).

#### HPLC data

##### Peptide1

Linear gradient 20→85% B in 25 mins, total run 30 mins,  $t_R = 2.117$  min

##### Peptide 2

Linear gradient 20→70% B in 30 mins,  $t_R = 4.315$  min

##### Peptide 3

Linear gradient 30→85% B in 30 mins,  $t_R = 13.466$  min

##### Peptide 4

Linear gradient 50→90% B in 10 mins, total run 20 mins,  $t_R = 18.701$  min

HPLC chromatogram of

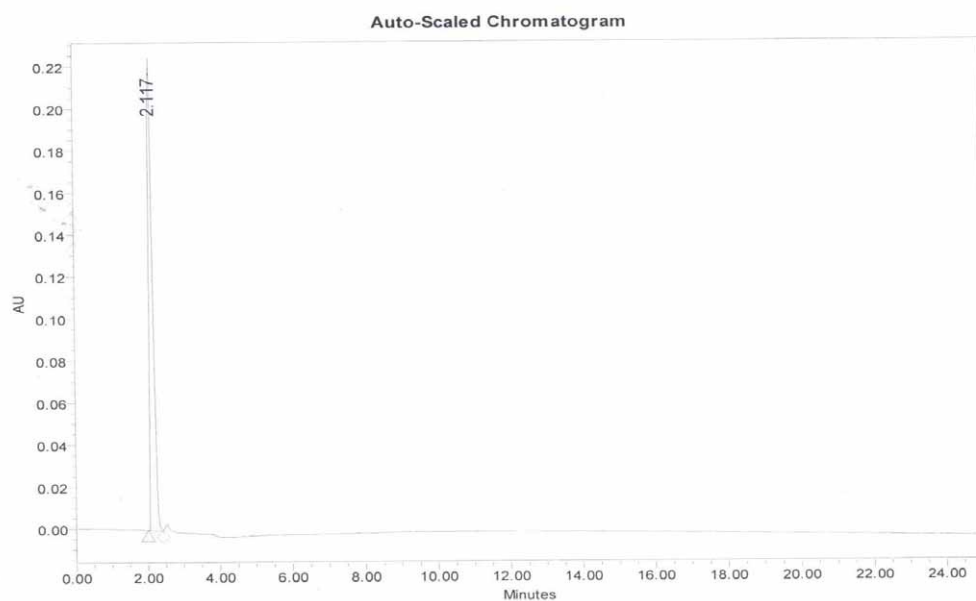

**Peak Results**

| Name | RT    | Area    | Height | % Area |
|------|-------|---------|--------|--------|
| 1    | 2.117 | 1653953 | 220774 | 100.00 |

1

HPLC chromatogram of

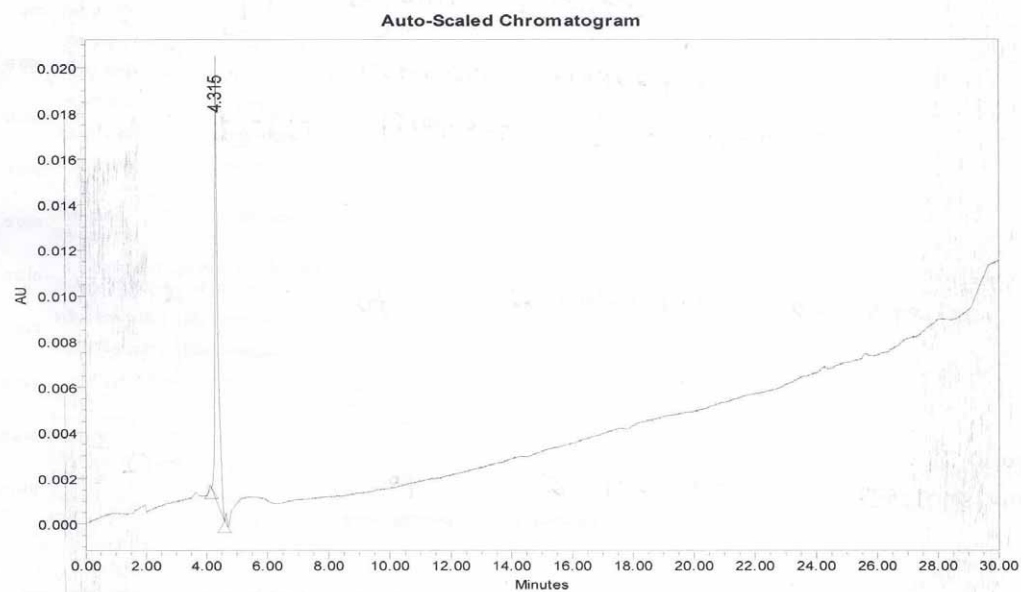

**Peak Results**

| Name | RT    | Area   | Height | % Area |
|------|-------|--------|--------|--------|
| 1    | 4.315 | 122370 | 19124  | 100.00 |

2

### HPLC chromatogram of **3**

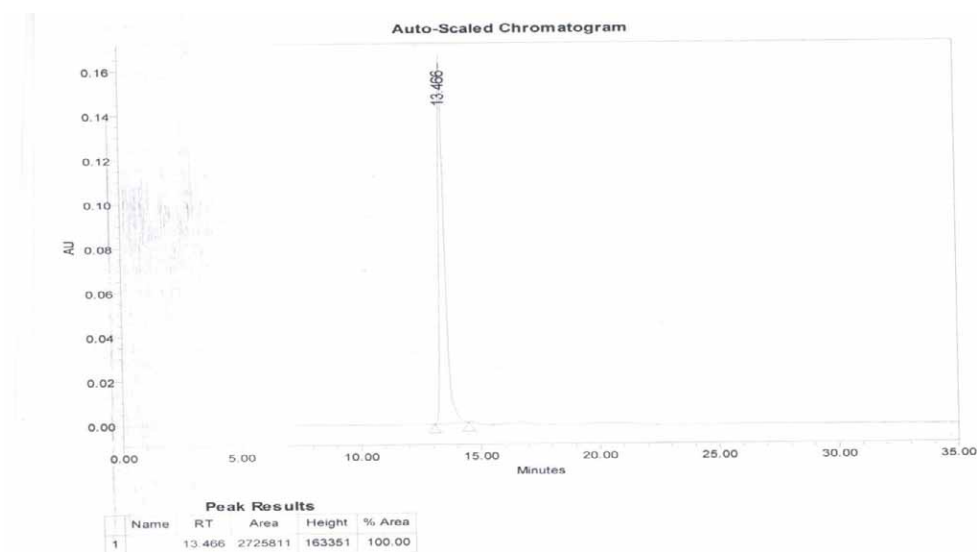

### HPLC chromatogram of **4**

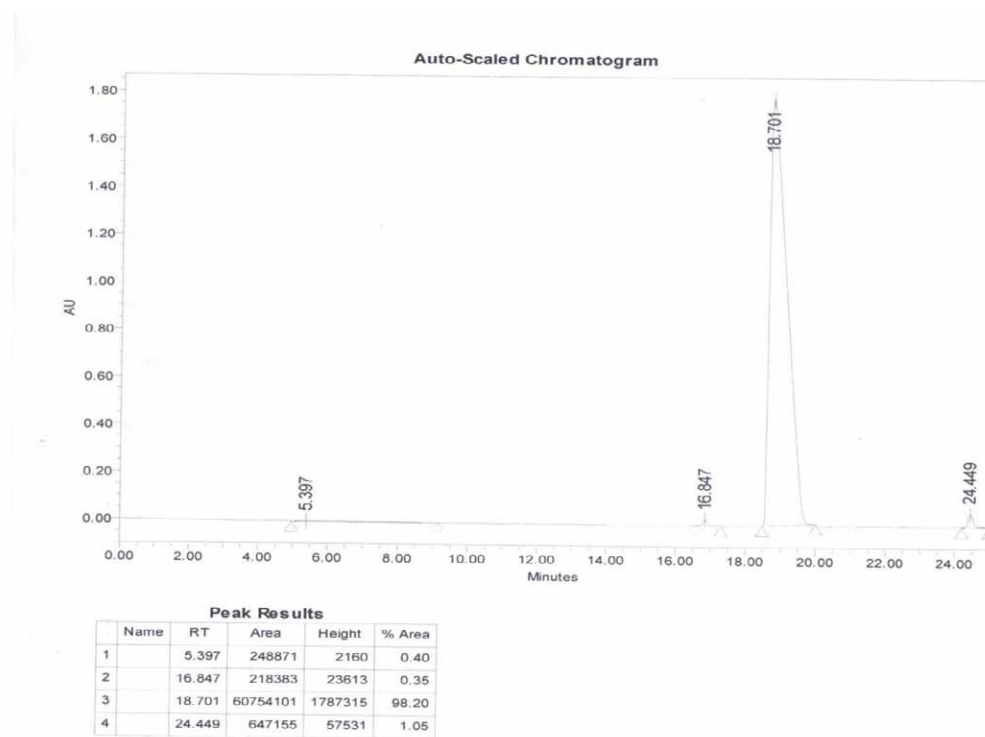

TOCSY spectrum of **1** (DMSO-D<sub>6</sub>, 300 K, 400 MHz)

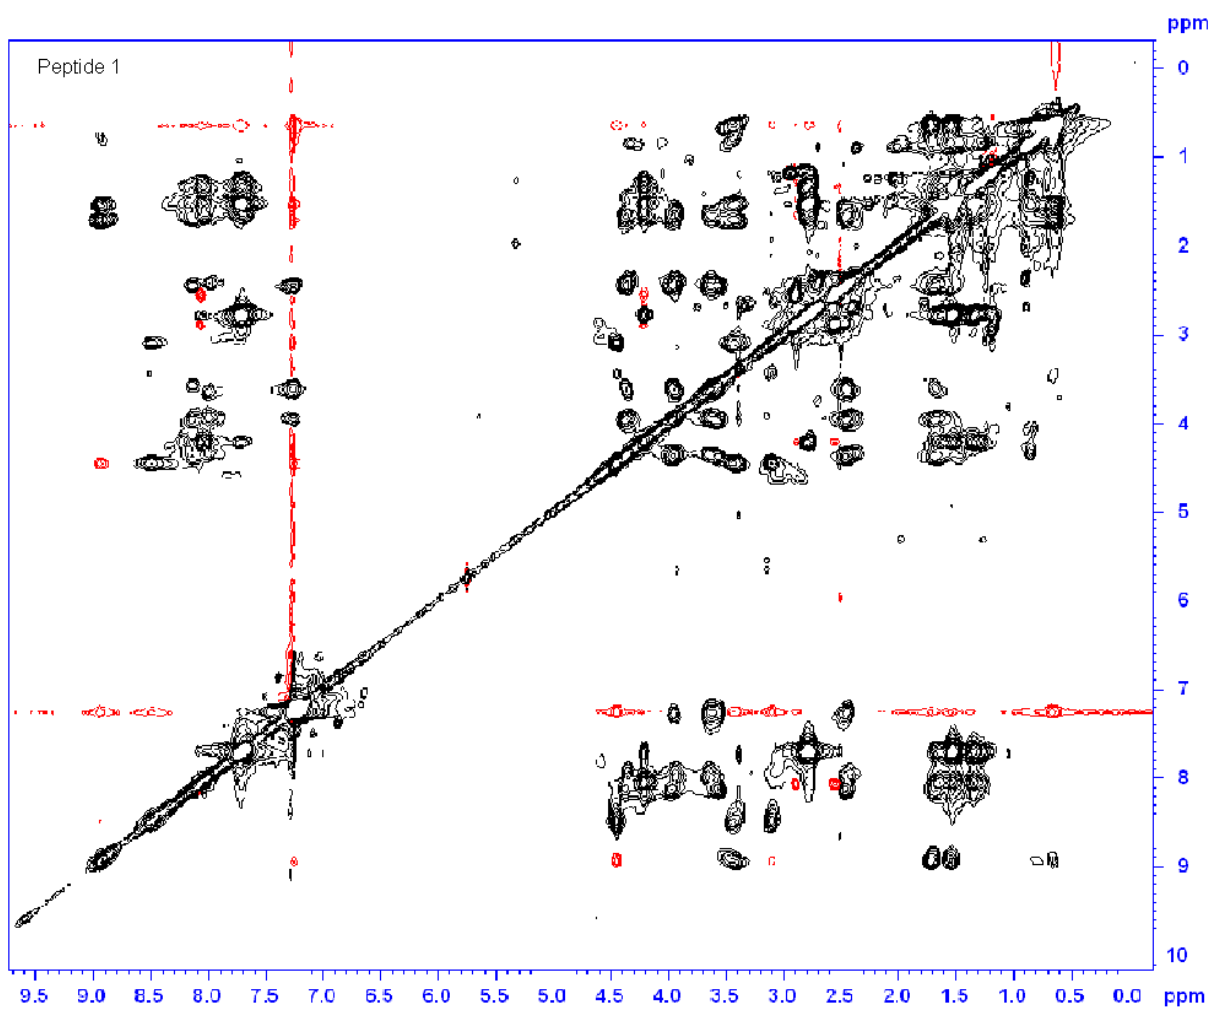

TOCSY spectrum of **2** (DMSO-D<sub>6</sub>, 300 K, 400 MHz)

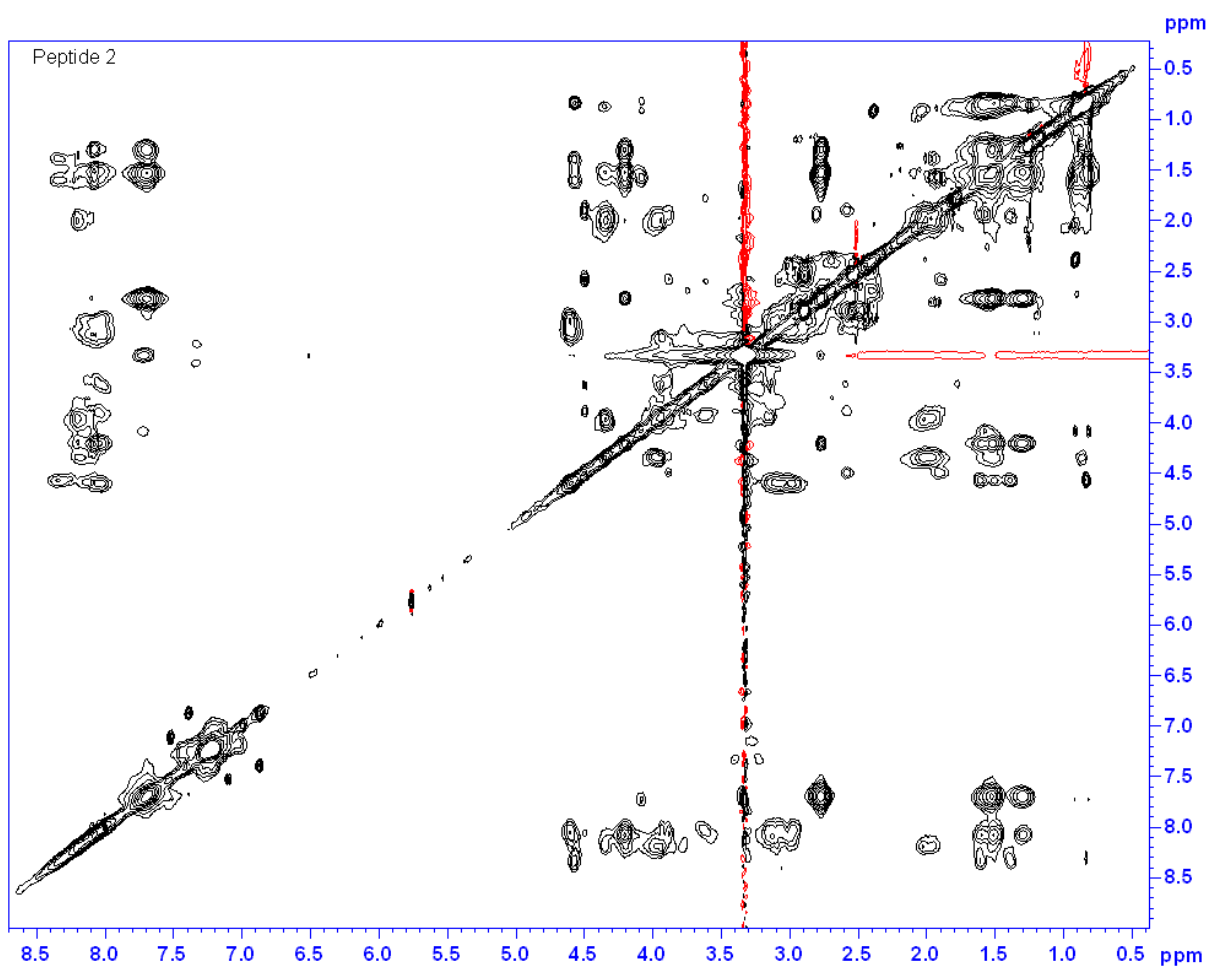

TOCSY spectrum of **3** (DMSO-D<sub>6</sub>, 300 K, 400 MHz)

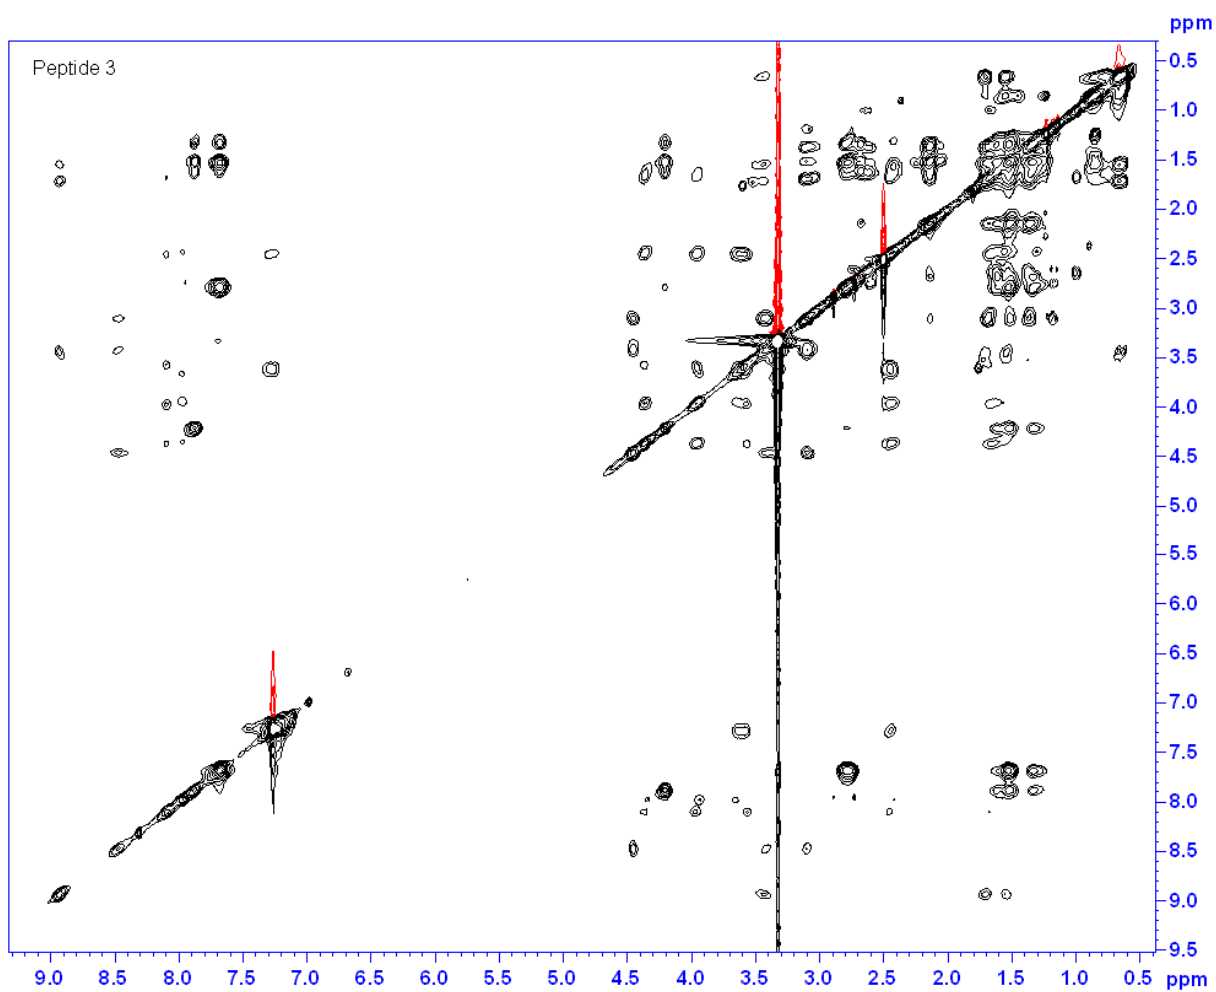

TOCSY spectrum of **4** (DMSO-D<sub>6</sub>, 300 K, 400 MHz)

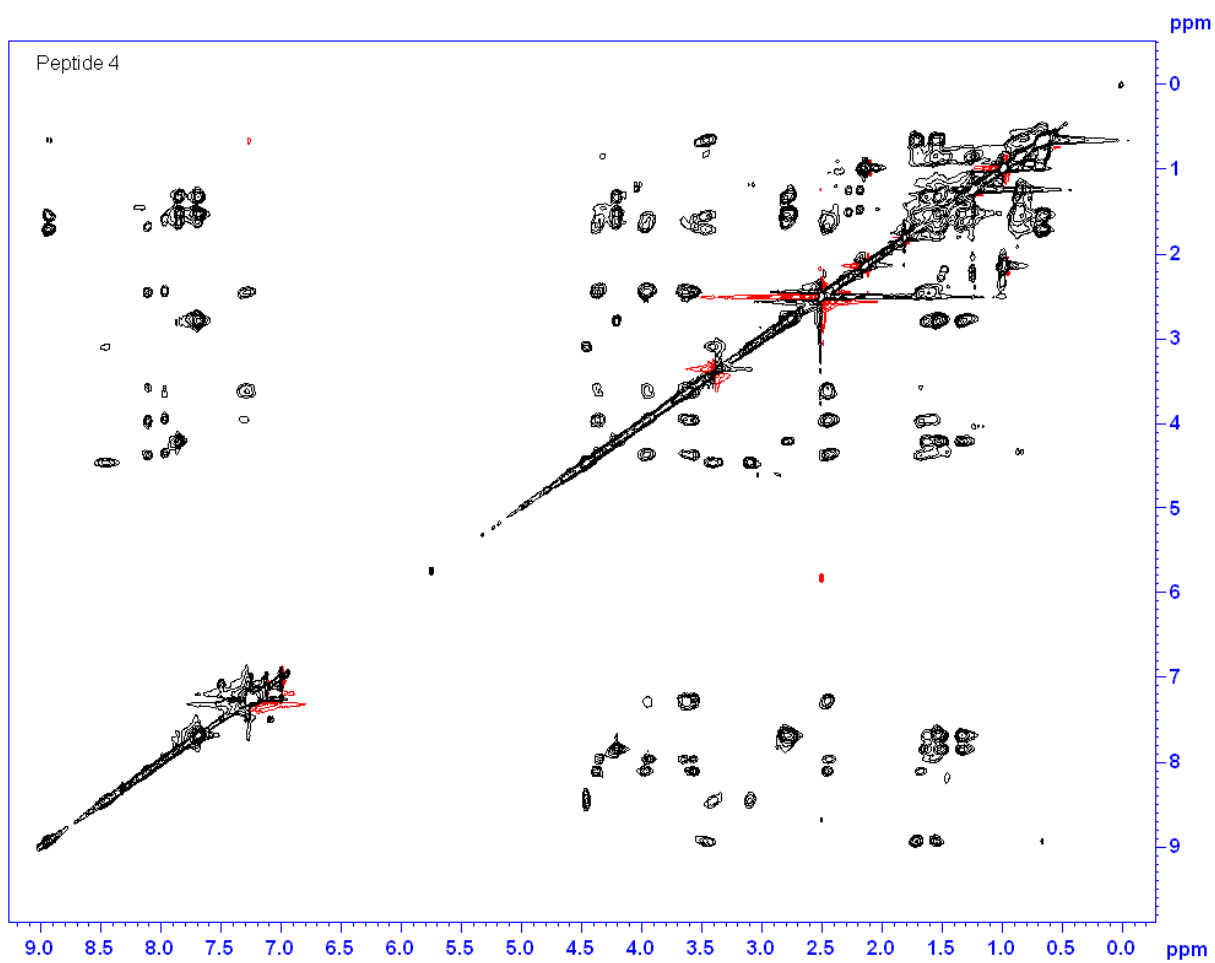

Supplement: c1ob05338h.pdf [file c1ob05338h.pdf]
